# Supplementary material for: Physiological modes of action across species and toxicants: the key to predictive ecotoxicology
Source: Royal Society of Chemistry journal article supplement (doi:10.1039/c7em00328e), 2017-11-01
Supplement: c7em00328e1.xlsx [file c7em00328e1.xlsx]

## Sheet: Sorted by year and study
	In several cases, the identification of MoA is not very formal (e.g., qualitative or based on groath data only)
								M	maintenance
	Ref	Species	Scientific name	Compound	pMoA	DOI		A	Assimilation
	KlokRoos1996	Earthworm	Lumbricus rubellus	copper	M+R	http://dx.doi.org/10.1006/eesa.1996.0015		G	Growth costs
	JageCrom2004	Springtail	Folsomia candida	cadmium	A	http://dx.doi.org/10.1021/es0352348		R	Reproduction costs
				triphenyltin	M			H	Hazard to embryo
	AldaJage2005	Nematode	Caenorhabditis elegans	cadmium	A	http://dx.doi.org/10.1111/j.1365-2435.2005.01012.x
	AldaJage2006a	Nematode	Acrobeloides nanus	cadmium	G	http://dx.doi.org/10.1897/06-097R.1
				pentachlorobenzene	A
				carbendazim	A
	AldaJage2006b	Nematode	Caenorhabditis elegans	pentachlorobenzene	G+R	http://dx.doi.org/10.1021/es052260s
				carbendazim	A
	JageHeug2006	Water flea	Daphnia magna	cadmium	A	http://dx.doi.org/10.1007/s10646-006-0060-x
	PietJage2006	Water flea	Daphnia magna	fenvalerate	A	http://dx.doi.org/10.1007/s10646-006-0100-6
	JageCrom2007	Springtail	Folsomia candida	chlorpyrifos	R	http://dx.doi.org/10.1016/j.envpol.2006.04.028
	BillDeli2008	Water flea	Daphnia magna	zinc	A/M	http://dx.doi.org/10.1021/es801418x
				copper	G
	Klok2008	Earthworm	Lumbricus rubellus	zinc	M	http://dx.doi.org/10.1021/es8016599
	BillFerr2009	Water flea	Moina micrura	toxic cyanobacteria	A/M	http://dx.doi.org/10.1016/j.jtbi.2008.07.029
	JageKlok2010	Earthworm	Dendrobaena octaedra	copper	A	http://dx.doi.org/10.1098/rstb.2010.0137
	JageVand2010	Water flea	Daphnia magna	pyrene	R	http://dx.doi.org/10.1007/s10646-009-0417-z
				fluoranthene	R
	MullNisb2010a	Mussel	Mytilus edulis	pentachlorophenol	A+M	http://dx.doi.org/10.1007/s10646-009-0385-3
		Mussel	Mytilus galloprovincialis	mercury	A
		Oyster	Crassostrea gigas	mercury	A/M
		Earthworm	Lumbricus rubellus	copper	A
		Zebrafish	Danio rerio	benzo(k)-fluoranthene	A
		Zebrafish	Danio rerio	PAH mixture	A
		Water flea	Daphnia magna	tetradifon	A
		Water flea	Daphnia magna	pyridine	M
	MullNisb2010b	Mussel	Mytilus galloprovincialis	produced water	A+M	http://dx.doi.org/10.1007/s10646-009-0384-4
		Mussel	Mytilus californianus	produced water	A+M
	SwaiWren	Nematode	Caenorhabditis elegans	cadmium	A	http://dx.doi.org/10.1186/1752-0509-4-32
				fluoranthene	G+R
				atrazine	M
	JageSelc2011	Polychaete	Capitella teleta	nonylphenol	G+R	http://dx.doi.org/10.1016/j.seares.2011.04.003
	MassBeau2011	Water flea	Daphnia magna	uranium	A	http://dx.doi.org/10.1021/es104082e
	WrenKill	Nematode	Caenorhabditis elegans	aldicarb	M	http://dx.doi.org/10.1007/s10646-010-0591-z
	AuguGagn2012	Zebrafish	Danio rerio	uranium	M+G	http://dx.doi.org/10.1016/j.aquatox.2012.02.029
	MartJage2013	Water flea	Daphnia magna	3,4-dichloroaniline	R/H	http://dx.doi.org/10.1007/s10646-013-1049-x
	BarsJage2014	Pond snail	Lymnaea stagnalis	acetone	A	http://dx.doi.org/10.1002/etc.2399
	JageGudm2014	Nematode	Caenorhabditis elegans	cadmium	A	http://dx.doi.org/10.1021/es501306t
				fluoranthene	G+R
	MullHann2014	Mussel	Mytilus galloprovincialis	zinc-oxide nanopart.	A+M	http://dx.doi.org/10.1016/j.seares.2013.12.013
	GousBeau2015	Nematode	Caenorhabditis elegans	uranium	A	http://dx.doi.org/10.1016/j.chemosphere.2014.09.006
	CedeNorh2016	Nematode	Caenorhabditis elegans	copper	A	http://dx.doi.org/10.1371/journal.pone.0140277
	JageRave2016	Sea urchin	Strongylocentrotus droebachiensis	pH (ocean acidification)	M	http://dx.doi.org/10.1016/j.jembe.2015.09.016
	MargGome	Nematode	Caenorhabditis elegans	uranium	A/M	http://dx.doi.org/10.1016/j.chemosphere.2015.12.029
				cadmium	A/M
	Hamd2013	Springtail	Folsomia candida	cadmium	A	PhD thesis: http://dare.ubvu.vu.nl/handle/1871/50121
	Zimm2013	Pond snail	Lymnaea stagnalis	diquat	A/M	PhD thesis: https://research.vu.nl/en/publications/the-pond-snail-under-stress-interactive-effects-of-food-limitatio
	Bars2015	Pond snail	Lymnaea stagnalis	tributyltin	A	Phd thesis: http://dare.ubvu.vu.nl/handle/1871/52194

## Sheet: Sorted by species
					M	maintenance
					A	Assimilation
					G	Growth costs
					R	Reproduction costs
					H	Hazard to embryo
	Ref	Species	Scientific name	Compound	pMoA	DOI
	AldaJage2006a	Nematode	Acrobeloides nanus	cadmium	G	http://dx.doi.org/10.1897/06-097R.1
	AldaJage2006a	Nematode	Acrobeloides nanus	carbendazim	A	http://dx.doi.org/10.1897/06-097R.1
	AldaJage2006a	Nematode	Acrobeloides nanus	pentachlorobenzene	A	http://dx.doi.org/10.1897/06-097R.1
	WrenKill	Nematode	Caenorhabditis elegans	aldicarb	M	http://dx.doi.org/10.1007/s10646-010-0591-z
	SwaiWren	Nematode	Caenorhabditis elegans	atrazine	M	http://dx.doi.org/10.1186/1752-0509-4-32
	AldaJage2005	Nematode	Caenorhabditis elegans	cadmium	A	http://dx.doi.org/10.1111/j.1365-2435.2005.01012.x
	SwaiWren	Nematode	Caenorhabditis elegans	cadmium	A	http://dx.doi.org/10.1186/1752-0509-4-32
	JageGudm2014	Nematode	Caenorhabditis elegans	cadmium	A	http://dx.doi.org/10.1021/es501306t
	MargGome	Nematode	Caenorhabditis elegans	cadmium	A/M	http://dx.doi.org/10.1016/j.chemosphere.2015.12.029
	AldaJage2006b	Nematode	Caenorhabditis elegans	carbendazim	A	http://dx.doi.org/10.1021/es052260s
	CedeNorh2016	Nematode	Caenorhabditis elegans	copper	A	http://dx.doi.org/10.1371/journal.pone.0140277
	SwaiWren	Nematode	Caenorhabditis elegans	fluoranthene	G+R	http://dx.doi.org/10.1186/1752-0509-4-32
	JageGudm2014	Nematode	Caenorhabditis elegans	fluoranthene	G+R	http://dx.doi.org/10.1021/es501306t
	AldaJage2006b	Nematode	Caenorhabditis elegans	pentachlorobenzene	G+R	http://dx.doi.org/10.1021/es052260s
	GousBeau2015	Nematode	Caenorhabditis elegans	uranium	A	http://dx.doi.org/10.1016/j.chemosphere.2014.09.006
	MargGome	Nematode	Caenorhabditis elegans	uranium	A/M	http://dx.doi.org/10.1016/j.chemosphere.2015.12.029
	JageSelc2011	Polychaete	Capitella teleta	nonylphenol	G+R	http://dx.doi.org/10.1016/j.seares.2011.04.003
	MullNisb2010a	Oyster	Crassostrea gigas	mercury	A/M	http://dx.doi.org/10.1007/s10646-009-0385-3
	MullNisb2010a	Zebrafish	Danio rerio	benzo(k)-fluoranthene	A	http://dx.doi.org/10.1007/s10646-009-0385-3
	MullNisb2010a	Zebrafish	Danio rerio	PAH mixture	A	http://dx.doi.org/10.1007/s10646-009-0385-3
	AuguGagn2012	Zebrafish	Danio rerio	uranium	M+G	http://dx.doi.org/10.1016/j.aquatox.2012.02.029
	MartJage2013	Water flea	Daphnia magna	3,4-dichloroaniline	R/H	http://dx.doi.org/10.1007/s10646-013-1049-x
	JageHeug2006	Water flea	Daphnia magna	cadmium	A	http://dx.doi.org/10.1007/s10646-006-0060-x
	BillDeli2008	Water flea	Daphnia magna	copper	G	http://dx.doi.org/10.1021/es801418x
	PietJage2006	Water flea	Daphnia magna	fenvalerate	A	http://dx.doi.org/10.1007/s10646-006-0100-6
	JageVand2010	Water flea	Daphnia magna	fluoranthene	R	http://dx.doi.org/10.1007/s10646-009-0417-z
	JageVand2010	Water flea	Daphnia magna	pyrene	R	http://dx.doi.org/10.1007/s10646-009-0417-z
	MullNisb2010a	Water flea	Daphnia magna	pyridine	M	http://dx.doi.org/10.1007/s10646-009-0385-3
	MullNisb2010a	Water flea	Daphnia magna	tetradifon	A	http://dx.doi.org/10.1007/s10646-009-0385-3
	MassBeau2011	Water flea	Daphnia magna	uranium	A	http://dx.doi.org/10.1021/es104082e
	BillDeli2008	Water flea	Daphnia magna	zinc	A/M	http://dx.doi.org/10.1021/es801418x
	JageKlok2010	Earthworm	Dendrobaena octaedra	copper	A	http://dx.doi.org/10.1098/rstb.2010.0137
	JageCrom2004	Springtail	Folsomia candida	cadmium	A	http://dx.doi.org/10.1021/es0352348
	Hamd2013	Springtail	Folsomia candida	cadmium	A	PhD thesis: http://dare.ubvu.vu.nl/handle/1871/50121
	JageCrom2007	Springtail	Folsomia candida	chlorpyrifos	R	http://dx.doi.org/10.1016/j.envpol.2006.04.028
	JageCrom2004	Springtail	Folsomia candida	triphenyltin	M	http://dx.doi.org/10.1021/es0352348
	KlokRoos1996	Earthworm	Lumbricus rubellus	copper	M+R	http://dx.doi.org/10.1006/eesa.1996.0015
	MullNisb2010a	Earthworm	Lumbricus rubellus	copper	A	http://dx.doi.org/10.1007/s10646-009-0385-3
	Klok2008	Earthworm	Lumbricus rubellus	zinc	M	http://dx.doi.org/10.1021/es8016599
	BarsJage2014	Pond snail	Lymnaea stagnalis	acetone	A	http://dx.doi.org/10.1002/etc.2399
	Zimm2013	Pond snail	Lymnaea stagnalis	diquat	A/M	PhD thesis: https://research.vu.nl/en/publications/the-pond-snail-under-stress-interactive-effects-of-food-limitatio
	Bars2015	Pond snail	Lymnaea stagnalis	tributyltin	A	Phd thesis: http://dare.ubvu.vu.nl/handle/1871/52194
	BillFerr2009	Water flea	Moina micrura	toxic cyanobacteria	A/M	http://dx.doi.org/10.1016/j.jtbi.2008.07.029
	MullNisb2010b	Mussel	Mytilus californianus	produced water	A+M	http://dx.doi.org/10.1007/s10646-009-0384-4
	MullNisb2010a	Mussel	Mytilus galloprovincialis	mercury	A	http://dx.doi.org/10.1007/s10646-009-0385-3
	MullNisb2010b	Mussel	Mytilus galloprovincialis	produced water	A+M	http://dx.doi.org/10.1007/s10646-009-0384-4
	MullHann2014	Mussel	Mytilus galloprovincialis	zinc-oxide nanopart.	A+M	http://dx.doi.org/10.1016/j.seares.2013.12.013
	MullNisb2010a	Mussel	Mytilus edulis	pentachlorophenol	A+M	http://dx.doi.org/10.1007/s10646-009-0385-3
	JageRave2016	Sea urchin	Strongylocentrotus droebachiensis	pH (ocean acidification)	M	http://dx.doi.org/10.1016/j.jembe.2015.09.016

## Sheet: Sorted by compound
					M	maintenance
					A	Assimilation
					G	Growth costs
					R	Reproduction costs
					H	Hazard to embryo
	Ref	Species	Scientific name	Compound	pMoA	DOI
	MartJage2013	Water flea	Daphnia magna	3,4-dichloroaniline	R/H	http://dx.doi.org/10.1007/s10646-013-1049-x
	BarsJage2014	Pond snail	Lymnaea stagnalis	acetone	A	http://dx.doi.org/10.1002/etc.2399
	WrenKill	Nematode	Caenorhabditis elegans	aldicarb	M	http://dx.doi.org/10.1007/s10646-010-0591-z
	SwaiWren	Nematode	Caenorhabditis elegans	atrazine	M	http://dx.doi.org/10.1186/1752-0509-4-32
	MullNisb2010a	Zebrafish	Danio rerio	benzo(k)-fluoranthene	A	http://dx.doi.org/10.1007/s10646-009-0385-3
	AldaJage2006a	Nematode	Acrobeloides nanus	cadmium	G	http://dx.doi.org/10.1897/06-097R.1
	AldaJage2005	Nematode	Caenorhabditis elegans	cadmium	A	http://dx.doi.org/10.1111/j.1365-2435.2005.01012.x
	SwaiWren	Nematode	Caenorhabditis elegans	cadmium	A	http://dx.doi.org/10.1186/1752-0509-4-32
	JageGudm2014	Nematode	Caenorhabditis elegans	cadmium	A	http://dx.doi.org/10.1021/es501306t
	MargGome	Nematode	Caenorhabditis elegans	cadmium	A/M	http://dx.doi.org/10.1016/j.chemosphere.2015.12.029
	JageHeug2006	Water flea	Daphnia magna	cadmium	A	http://dx.doi.org/10.1007/s10646-006-0060-x
	JageCrom2004	Springtail	Folsomia candida	cadmium	A	http://dx.doi.org/10.1021/es0352348
	Hamd2013	Springtail	Folsomia candida	cadmium	A	PhD thesis: http://dare.ubvu.vu.nl/handle/1871/50121
	AldaJage2006a	Nematode	Acrobeloides nanus	carbendazim	A	http://dx.doi.org/10.1897/06-097R.1
	AldaJage2006b	Nematode	Caenorhabditis elegans	carbendazim	A	http://dx.doi.org/10.1021/es052260s
	JageCrom2007	Springtail	Folsomia candida	chlorpyrifos	R	http://dx.doi.org/10.1016/j.envpol.2006.04.028
	CedeNorh2016	Nematode	Caenorhabditis elegans	copper	A	http://dx.doi.org/10.1371/journal.pone.0140277
	BillDeli2008	Water flea	Daphnia magna	copper	G	http://dx.doi.org/10.1021/es801418x
	JageKlok2010	Earthworm	Dendrobaena octaedra	copper	A	http://dx.doi.org/10.1098/rstb.2010.0137
	KlokRoos1996	Earthworm	Lumbricus rubellus	copper	M+R	http://dx.doi.org/10.1006/eesa.1996.0015
	MullNisb2010a	Earthworm	Lumbricus rubellus	copper	A	http://dx.doi.org/10.1007/s10646-009-0385-3
	Zimm2013	Pond snail	Lymnaea stagnalis	diquat	A/M	PhD thesis: https://research.vu.nl/en/publications/the-pond-snail-under-stress-interactive-effects-of-food-limitatio
	PietJage2006	Water flea	Daphnia magna	fenvalerate	A	http://dx.doi.org/10.1007/s10646-006-0100-6
	SwaiWren	Nematode	Caenorhabditis elegans	fluoranthene	G+R	http://dx.doi.org/10.1186/1752-0509-4-32
	JageGudm2014	Nematode	Caenorhabditis elegans	fluoranthene	G+R	http://dx.doi.org/10.1021/es501306t
	JageVand2010	Water flea	Daphnia magna	fluoranthene	R	http://dx.doi.org/10.1007/s10646-009-0417-z
	MullNisb2010a	Oyster	Crassostrea gigas	mercury	A/M	http://dx.doi.org/10.1007/s10646-009-0385-3
	MullNisb2010a	Mussel	Mytilus galloprovincialis	mercury	A	http://dx.doi.org/10.1007/s10646-009-0385-3
	JageSelc2011	Polychaete	Capitella teleta	nonylphenol	G+R	http://dx.doi.org/10.1016/j.seares.2011.04.003
	MullNisb2010a	Zebrafish	Danio rerio	PAH mixture	A	http://dx.doi.org/10.1007/s10646-009-0385-3
	AldaJage2006a	Nematode	Acrobeloides nanus	pentachlorobenzene	A	http://dx.doi.org/10.1897/06-097R.1
	AldaJage2006b	Nematode	Caenorhabditis elegans	pentachlorobenzene	G+R	http://dx.doi.org/10.1021/es052260s
	MullNisb2010a	Mussel	Mytilus edulis	pentachlorophenol	A+M	http://dx.doi.org/10.1007/s10646-009-0385-3
	JageRave2016	Sea urchin	Strongylocentrotus droebachiensis	pH (ocean acidification)	M	http://dx.doi.org/10.1016/j.jembe.2015.09.016
	MullNisb2010b	Mussel	Mytilus californianus	produced water	A+M	http://dx.doi.org/10.1007/s10646-009-0384-4
	MullNisb2010b	Mussel	Mytilus galloprovincialis	produced water	A+M	http://dx.doi.org/10.1007/s10646-009-0384-4
	JageVand2010	Water flea	Daphnia magna	pyrene	R	http://dx.doi.org/10.1007/s10646-009-0417-z
	MullNisb2010a	Water flea	Daphnia magna	pyridine	M	http://dx.doi.org/10.1007/s10646-009-0385-3
	MullNisb2010a	Water flea	Daphnia magna	tetradifon	A	http://dx.doi.org/10.1007/s10646-009-0385-3
	BillFerr2009	Water flea	Moina micrura	toxic cyanobacteria	A/M	http://dx.doi.org/10.1016/j.jtbi.2008.07.029
	Bars2015	Pond snail	Lymnaea stagnalis	tributyltin	A	Phd thesis: http://dare.ubvu.vu.nl/handle/1871/52194
	JageCrom2004	Springtail	Folsomia candida	triphenyltin	M	http://dx.doi.org/10.1021/es0352348
	GousBeau2015	Nematode	Caenorhabditis elegans	uranium	A	http://dx.doi.org/10.1016/j.chemosphere.2014.09.006
	MargGome	Nematode	Caenorhabditis elegans	uranium	A/M	http://dx.doi.org/10.1016/j.chemosphere.2015.12.029
	AuguGagn2012	Zebrafish	Danio rerio	uranium	M+G	http://dx.doi.org/10.1016/j.aquatox.2012.02.029
	MassBeau2011	Water flea	Daphnia magna	uranium	A	http://dx.doi.org/10.1021/es104082e
	BillDeli2008	Water flea	Daphnia magna	zinc	A/M	http://dx.doi.org/10.1021/es801418x
	Klok2008	Earthworm	Lumbricus rubellus	zinc	M	http://dx.doi.org/10.1021/es8016599
	MullHann2014	Mussel	Mytilus galloprovincialis	zinc-oxide nanopart.	A+M	http://dx.doi.org/10.1016/j.seares.2013.12.013
